# Supplementary figures and images for: Preparation and Application of Quaternized Chitosan- and AgNPs-Base Synergistic Antibacterial Hydrogel for Burn Wound Healing
Source: MDPI journal article supplement (doi:10.3390/molecules26134037), 2021-07-01

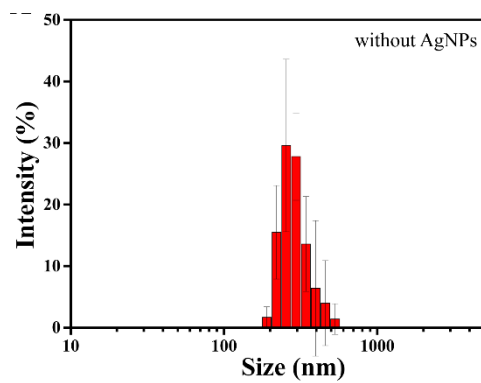

**Figure S1.** DLS of hydrogel solution without AgNPs.

Supplement: s1 [file s1]
